# Supplementary material for: Inhibition of UVB-Induced Inflammation by Laminaria japonica Extract via Regulation of nc886-PKR Pathway
Source: MDPI journal article supplement (doi:10.3390/nu12071958), 2020-06-30
Supplement: s1 [file s1]

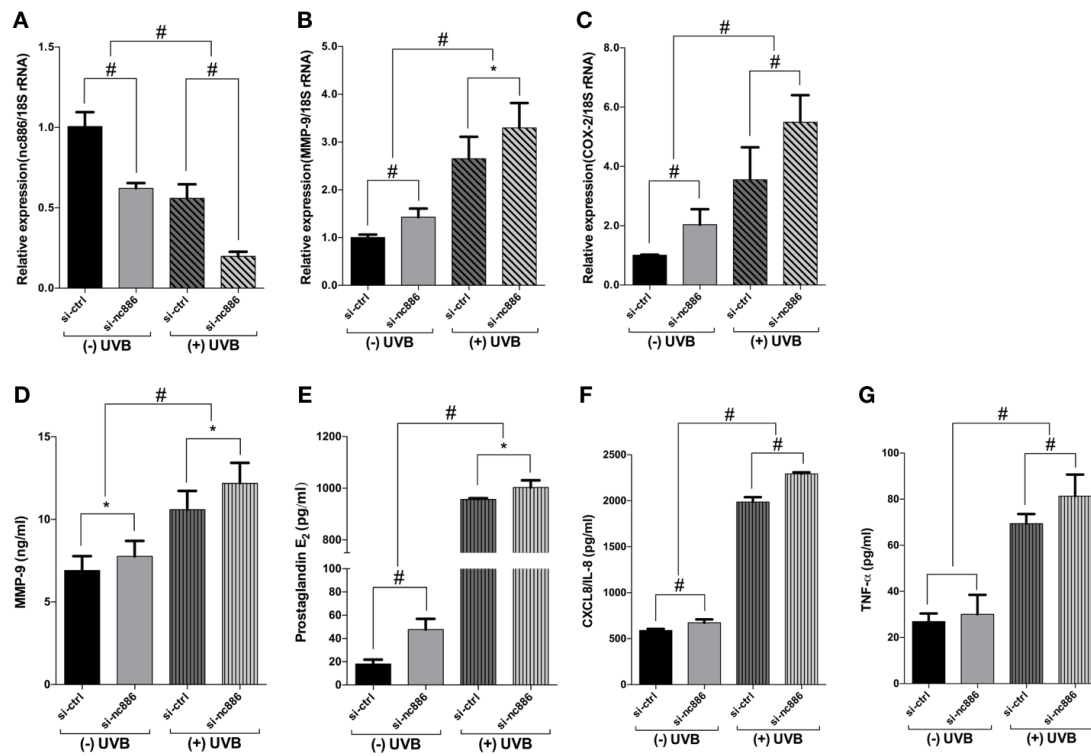

**Figure.S1. Knockdown of nc886 further increases the expression of MMP-9 and COX-2, which are increased by UVB.** UVB irradiation (5mJ/cm<sup>2</sup>) was administered 24 h after transfection with 250 pmol of each anti-oligonucleotide. Each of the RNA samples was analyzed with quantitative real-time polymerase chain reaction (qRT-PCR) and the cell culture fluid was subjected to ELISA. Each of the factors (A) nc886, (B) MMP-9, (C) COX-2 was indicated by a fold change compared with the control. The mRNA level was normalized with the expression of 18S rRNA. The values of (D) MMP-9, (E) PGE<sub>2</sub>, (F) IL-8, and (G) TNF- $\alpha$  were indicated by their absolute concentrations. \* $P < 0.05$ , # $P < 0.01$ , compared with basal levels.
